# Supplementary material for: Post-acute sequelae of COVID-19 and longitudinal antibody levels in a community-based cohort
Source: PubMed Central journal article supplement (PMC10490864; doi:10.1371/journal.pone.0291259), 2023-09-08
Supplement: pone.0291259.s001.pdf [file pone.0291259.s001.pdf]

# DFW COVID-19 Prevalence Study

---

MRN: \_\_\_\_\_

---

We appreciate your participation in the DFW COVID-19 Prevalence Study to help us better understand the impact of COVID-19 on our Dallas and Tarrant county communities. This study is being conducted by the University of Texas Southwestern Medical Center and Texas Health Resources. Your participation and answers are confidential.

After you complete the survey, a member of our team will contact you to schedule your COVID antibody testing. If you have any questions, please contact the research team at 214-648-5005.

Apreciamos su participación en el Estudio de Prevalencia de COVID-19 en DFW para ayudarnos a entender mejor el impacto de COVID-19 en nuestras comunidades de los Condados de Dallas y Tarrant. Este estudio se está llevando a cabo por University of Texas Southwestern Medical Center y Texas Health Resources. Su participación y respuestas son confidenciales.

Después de que complete la encuesta, un miembro de nuestro equipo se comunicará con usted para programar su prueba de anticuerpos de COVID. Si tiene alguna pregunta, por favor comuníquese con el equipo de investigación al 214-648-5005.

---

What language do you prefer?  
¿Qué idioma prefiere?

- English/Inglés  
 Spanish/Español

The survey will begin upon making this selection.  
La encuesta comenzará al hacer esta selección.

---

Since your study participation on [appt\_date] have you been tested for COVID-19 again?

- Yes - one time  
 Yes - more than one time  
 No

---

Desde su participación en el estudio en [appt\_date], ¿se ha hecho la prueba de COVID-19 otra vez?

- Sí - una vez  
 Sí - más de una vez  
 No

---

What month were you tested? If you have been tested more than once, please enter the month of your most recent test.

- September 2020  
 October 2020  
 November 2020  
 December 2020  
 January 2021  
 February 2021  
 March 2021  
 April 2021  
 May 2021  
 June 2021  
 July 2021  
 August 2021  
 September 2021  
 October 2021  
 November 2021

---

¿En qué mes le hicieron la prueba? Si le han hecho la prueba más de una vez, por favor ingrese el mes de su prueba más reciente.

- Septiembre de 2020
- Octubre de 2020
- Noviembre de 2020
- Diciembre de 2020
- Enero de 2021
- Febrero de 2021
- Marzo de 2021
- Abril de 2021
- Mayo de 2021
- Junio de 2021
- Julio de 2021
- Agosto de 2021
- Septiembre de 2021
- Octubre de 2021
- Noviembre de 2021

---

What were the results of these COVID-19 test(s) after study participation?

- I had COVID-19
- I did NOT have COVID-19
- The test could not determine if I had COVID-19 or I did not get my results

---

¿Cuál fue el resultado de esta(s) prueba(s) de COVID-19 después de la participación en el estudio?

- Yo tenía COVID-19
- Yo NO tenía COVID-19
- La prueba no pudo determinar si yo tenía COVID-19, o no recibí mis resultados

---

Have you received the COVID-19 vaccine?

- No
- Yes, I received the COVID-19 vaccine

---

¿Ha recibido la vacuna contra el COVID-19?

- No
- Sí, recibí la vacuna contra el COVID-19

---

What COVID-19 vaccine did you receive?

- Moderna
- Pfizer
- AstraZeneca
- Johnson and Johnson (J&J) or Janssen
- Other
- I don't know

---

¿Qué vacuna contra el COVID-19 recibió?

- Moderna
- Pfizer
- AstraZeneca
- Johnson and Johnson (J&J) o Janssen
- Otra
- No sé

---

When did you receive your first dose of COVID-19 vaccine?

- In a clinical trial before December 2020
- December 2020
- January 2021
- February 2021
- March 2021
- April 2021
- May 2021
- June 2021
- July 2021
- August 2021
- September 2021
- October 2021
- November 2021

---

¿Cuándo recibió la primera dosis de la vacuna contra el COVID-19?

- En un ensayo clínico antes de diciembre de 2020
- Diciembre de 2020
- Enero de 2021
- Febrero de 2021
- Marzo de 2021
- Abril de 2021
- Mayo de 2021
- Junio de 2021
- Julio de 2021
- Agosto de 2021
- Septiembre de 2021
- Octubre de 2021
- Noviembre de 2021

---

Do you plan to take the COVID-19 vaccine when offered?

- Very unlikely
- Unlikely
- Undecided
- Likely
- Very likely

---

¿Planea ponerse la vacuna contra el COVID-19 cuando sea ofrecida?

- Muy improbable
- Improbable
- Indeciso(a)
- Probable
- Muy probable

---

Why would you NOT get a COVID-19 vaccine?

- I'm allergic to vaccines.
- I don't like needles.
- I'm not concerned about getting really sick from COVID-19.
- I'm concerned about side effects from the COVID-19 vaccine.
- I don't think COVID-19 vaccines work very well.
- I don't trust that the COVID-19 vaccine will be safe long-term.
- I don't believe the COVID-19 pandemic is as bad as some people say it is.
- I don't know enough about how well a COVID-19 vaccine works.
- Other, please specify: \_\_\_\_\_  
(Please select all that apply)

---

¿Por qué NO se pondría la vacuna contra el COVID-19?

- Soy alérgico(a) a las vacunas
- No me gustan las agujas
- No me preocupa enfermarme mucho de COVID-19.
- Me preocupan los efectos secundarios de la vacuna contra el COVID-19.
- No creo que las vacunas contra el COVID-19 funcionen muy bien.
- No confío en que la vacuna contra el COVID-19 será segura a largo plazo.
- No creo que la pandemia de COVID-19 sea tan mala como dicen algunas personas.
- No sé lo suficiente sobre qué tan bien funciona una vacuna contra el COVID-19.
- Otra, por favor especifique: \_\_\_\_\_

Have you had any of the following symptoms (new or worse compared to one year ago)?

- Fever \_\_\_\_\_
- Shortness of breath or trouble breathing \_\_\_\_\_
- Cough \_\_\_\_\_
- Sore throat \_\_\_\_\_
- Loss of smell or taste \_\_\_\_\_
- Muscle aches or body aches \_\_\_\_\_
- Fatigue \_\_\_\_\_
- Headaches \_\_\_\_\_
- Dizziness \_\_\_\_\_
- Difficulty sleeping \_\_\_\_\_
- Being irritable \_\_\_\_\_
- Feeling depressed or tearful \_\_\_\_\_
- Slowed thinking \_\_\_\_\_
- Feeling in a "fog" \_\_\_\_\_
- No symptoms

¿Ha tenido alguno de los siguientes síntomas (nuevos o peores comparado a un año atrás)

- Fiebre \_\_\_\_\_
- Falta de aire o dificultad para respirar \_\_\_\_\_
- Tos \_\_\_\_\_
- Dolor de garganta \_\_\_\_\_
- Pérdida del olfato o del gusto \_\_\_\_\_
- Dolores musculares o del cuerpo \_\_\_\_\_
- Fatiga \_\_\_\_\_
- Dolores de cabeza \_\_\_\_\_
- Mareo \_\_\_\_\_
- Dificultad para dormir \_\_\_\_\_
- Estar irritable \_\_\_\_\_
- Sentirse deprimido(a) o lloroso(a) \_\_\_\_\_
- Pensamiento lento \_\_\_\_\_
- Sentirse aturdido(a) \_\_\_\_\_
- No síntomas

Since study participation, have you ever been told by a doctor or other healthcare professional that you developed any of the following? Please select all that apply.

- Heart disease
- Lung disease
- Ulcer or stomach disease
- Liver disease
- Cancer
- HIV
- Stroke
- Currently pregnant
- Auto-immune disease
- High blood pressure
- Diabetes
- Kidney disease
- Anemia or other blood disease
- Rheumatoid arthritis
- Neurologic (brain) disease (e.g., dementia)
- Obesity
- Immunocompromised, please specify \_\_\_\_\_
- Other, please specify \_\_\_\_\_
- None of the above

Desde la participación en el estudio, ¿alguna vez le ha dicho un doctor u otro profesional de la salud que usted desarrolló alguno de los siguientes? Por favor seleccione todos los que apliquen.

- Enfermedad del corazón
- Enfermedad pulmonar
- Úlcera o enfermedad estomacal
- Enfermedad del hígado
- Cáncer
- VIH
- Derrame cerebral
- Actualmente embarazada
- Enfermedad autoinmune
- Alta presión
- Diabetes
- Enfermedad de los riñones
- Anemia u otra enfermedad de la sangre
- Artritis reumatoide
- Enfermedad neurológica (cerebral) (por ejemplo, demencia)
- Obesidad
- Inmunocomprometido(a), por favor especifique \_\_\_\_\_
- Otro, por favor especifique \_\_\_\_\_
- Ninguna de las anteriores

During your COVID infection, did you experience any COVID-related symptoms? COVID symptoms include fever, shortness of breath/trouble breathing, cough, sore throat, loss of smell or taste, muscle/body aches.

- Yes
- No
- Don't recall

Durante su infección de COVID, ¿experimentó algún síntoma relacionado con COVID? Los síntomas de COVID incluyen fiebre, falta de aire/dificultad para respirar, tos, dolor de garganta, pérdida del olfato o del gusto, dolores musculares/corporales.

- Sí
- No
- No recuerdo

Were the symptoms severe enough that you went to the emergency department or were admitted to the hospital?

- Yes, I went to the emergency department but was not admitted to the hospital
- Yes, I was admitted to the hospital
- No

¿Fueron los síntomas lo suficientemente severos que fue a la sala de emergencias o fue admitido(a) en el hospital?

- Sí, fui a la sala de emergencias, pero no me admitieron en el hospital
- Sí, fui admitido(a) en el hospital
- No

How long did it take for you to return to your normal state of health?

- Within one week
- Longer than one week but within one month
- More than one month but within three months
- More than three months but within 6 months
- More than 6 months
- I still feel like I am not back to my usual state of health

¿Cuánto tiempo le tomó para regresar a su estado normal de salud?

- En una semana
- Más de una semana, pero menos de un mes
- Más de un mes, pero menos de tres meses
- Más de tres meses, pero menos de 6 meses
- Más de 6 meses
- Aún siento como que no he regresado a mi estado normal de salud

If you are not back at usual state of health, what symptoms are you still experiencing?

- Shortness of breath or trouble breathing
- Cough
- Sore throat
- Loss of smell or taste
- Muscle aches or body aches
- Fatigue
- Headaches
- Dizziness
- Difficulty sleeping
- Being irritable
- Feeling depressed or tearful
- Slowed thinking
- Other, please specify \_\_\_\_\_

Si no ha regresado a su estado normal de salud, ¿qué síntomas aún está experimentando?

- Falta de aire o dificultad para respirar
- Tos
- Dolor de garganta
- Pérdida del olfato o del gusto
- Dolores musculares o del cuerpo
- Fatiga
- Dolores de cabeza
- Mareo
- Dificultad para dormir
- Estar irritable
- Sentirse deprimido(a) o lloroso(a)
- Pensamiento lento
- Otro, por favor especifique \_\_\_\_\_

Please describe the nature of your symptoms

- Symptoms have been constant without any change over time
- Symptoms have slowly been improving over time
- Symptoms have slowly been getting worse over time
- Symptoms come and go at different times and seem unpredictable
- I had new "long-hauler" symptoms start after my COVID-19 infection had resolved
- Other, please specify \_\_\_\_\_

Por favor caracterice sus síntomas

- Síntomas han sido constantes sin ningún cambio con el paso del tiempo
- Síntomas han estado mejorando lentamente con el paso del tiempo
- Síntomas han estado empeorando lentamente con el paso del tiempo
- Síntomas vienen y van en diferentes momentos y parecen impredecibles
- Tuve nuevos síntomas de "largo plazo" que empezaron después de que mi infección de COVID-19 se había resuelto
- Otro, por favor especifique \_\_\_\_\_

**Over the past 2 weeks, how often you been bothered by following problems?**

|                                             | Not at all            | Several days          | More than half the days | Nearly every day      |
|---------------------------------------------|-----------------------|-----------------------|-------------------------|-----------------------|
| Little interest or pleasure in doing things | <input type="radio"/> | <input type="radio"/> | <input type="radio"/>   | <input type="radio"/> |
| Feeling down, depressed, or hopeless        | <input type="radio"/> | <input type="radio"/> | <input type="radio"/>   | <input type="radio"/> |
| Feeling nervous, anxious, or on edge        | <input type="radio"/> | <input type="radio"/> | <input type="radio"/>   | <input type="radio"/> |
| Not being able to stop or control worrying  | <input type="radio"/> | <input type="radio"/> | <input type="radio"/>   | <input type="radio"/> |

**En las últimas 2 semanas, ¿qué tan seguido le han molestado los siguientes problemas?**

|                                                    | Ningún día            | Varios días           | Más de la mitad de los días | Casi todos los días   |
|----------------------------------------------------|-----------------------|-----------------------|-----------------------------|-----------------------|
| Poco interés o placer en hacer cosas               | <input type="radio"/> | <input type="radio"/> | <input type="radio"/>       | <input type="radio"/> |
| Sentirse decaído(a), deprimido(a) o sin esperanzas | <input type="radio"/> | <input type="radio"/> | <input type="radio"/>       | <input type="radio"/> |
| Sentirse nervioso(a), ansioso(a), o tenso(a)       | <input type="radio"/> | <input type="radio"/> | <input type="radio"/>       | <input type="radio"/> |
| No ser capaz de parar o controlar su preocupación  | <input type="radio"/> | <input type="radio"/> | <input type="radio"/>       | <input type="radio"/> |

**Please indicate how true each statement has been for you during the past 7 days.**

|                                                                  | Not at all            | A little bit          | Somewhat              | Quite a bit           | Very much             |
|------------------------------------------------------------------|-----------------------|-----------------------|-----------------------|-----------------------|-----------------------|
| I feel fatigued                                                  | <input type="radio"/> | <input type="radio"/> | <input type="radio"/> | <input type="radio"/> | <input type="radio"/> |
| I feel weak all over                                             | <input type="radio"/> | <input type="radio"/> | <input type="radio"/> | <input type="radio"/> | <input type="radio"/> |
| I feel listless (washed out)                                     | <input type="radio"/> | <input type="radio"/> | <input type="radio"/> | <input type="radio"/> | <input type="radio"/> |
| I feel tired                                                     | <input type="radio"/> | <input type="radio"/> | <input type="radio"/> | <input type="radio"/> | <input type="radio"/> |
| I have trouble starting things because I am tired                | <input type="radio"/> | <input type="radio"/> | <input type="radio"/> | <input type="radio"/> | <input type="radio"/> |
| I have trouble finishing things because I am tired               | <input type="radio"/> | <input type="radio"/> | <input type="radio"/> | <input type="radio"/> | <input type="radio"/> |
| I have energy                                                    | <input type="radio"/> | <input type="radio"/> | <input type="radio"/> | <input type="radio"/> | <input type="radio"/> |
| I am able to do my usual activities                              | <input type="radio"/> | <input type="radio"/> | <input type="radio"/> | <input type="radio"/> | <input type="radio"/> |
| I need to sleep during the day                                   | <input type="radio"/> | <input type="radio"/> | <input type="radio"/> | <input type="radio"/> | <input type="radio"/> |
| I am too tired to eat                                            | <input type="radio"/> | <input type="radio"/> | <input type="radio"/> | <input type="radio"/> | <input type="radio"/> |
| I need help doing my usual activities                            | <input type="radio"/> | <input type="radio"/> | <input type="radio"/> | <input type="radio"/> | <input type="radio"/> |
| I am frustrated by being too tired to do the things I want to do | <input type="radio"/> | <input type="radio"/> | <input type="radio"/> | <input type="radio"/> | <input type="radio"/> |

I have to limit my social activity because I am tired

**Por favor marque un solo número por línea para indicar la respuesta que corresponde a los últimos 7 días.**

|                                                                                                                                          | Nada                  | Un poco               | Algo                  | Mucho                 | Muchísimo             |
|------------------------------------------------------------------------------------------------------------------------------------------|-----------------------|-----------------------|-----------------------|-----------------------|-----------------------|
| Me siento agotado(a)                                                                                                                     | <input type="radio"/> | <input type="radio"/> | <input type="radio"/> | <input type="radio"/> | <input type="radio"/> |
| Siento debilidad en todo el cuerpo                                                                                                       | <input type="radio"/> | <input type="radio"/> | <input type="radio"/> | <input type="radio"/> | <input type="radio"/> |
| Me siento decaído(a)                                                                                                                     | <input type="radio"/> | <input type="radio"/> | <input type="radio"/> | <input type="radio"/> | <input type="radio"/> |
| Me siento cansado(a)                                                                                                                     | <input type="radio"/> | <input type="radio"/> | <input type="radio"/> | <input type="radio"/> | <input type="radio"/> |
| Tengo dificultad para comenzar las cosas porque estoy cansado(a)                                                                         | <input type="radio"/> | <input type="radio"/> | <input type="radio"/> | <input type="radio"/> | <input type="radio"/> |
| Tengo dificultad para terminar las cosas porque estoy cansado(a)                                                                         | <input type="radio"/> | <input type="radio"/> | <input type="radio"/> | <input type="radio"/> | <input type="radio"/> |
| Tengo energía                                                                                                                            | <input type="radio"/> | <input type="radio"/> | <input type="radio"/> | <input type="radio"/> | <input type="radio"/> |
| Puedo hacer mis actividades usuales Soy capaz de hacer mis actividades habituales (p. ej., trabajar, ir a la escuela, hacer las compras) | <input type="radio"/> | <input type="radio"/> | <input type="radio"/> | <input type="radio"/> | <input type="radio"/> |
| Necesito dormir durante el día                                                                                                           | <input type="radio"/> | <input type="radio"/> | <input type="radio"/> | <input type="radio"/> | <input type="radio"/> |
| Estoy demasiado cansado(a) para comer                                                                                                    | <input type="radio"/> | <input type="radio"/> | <input type="radio"/> | <input type="radio"/> | <input type="radio"/> |
| Necesito ayuda para hacer mis actividades habituales                                                                                     | <input type="radio"/> | <input type="radio"/> | <input type="radio"/> | <input type="radio"/> | <input type="radio"/> |
| Estoy frustrado(a) porque estoy demasiado cansado(a) para hacer las cosas que quiero hacer                                               | <input type="radio"/> | <input type="radio"/> | <input type="radio"/> | <input type="radio"/> | <input type="radio"/> |
| Tengo que limitar mis actividades sociales debido al cansancio                                                                           | <input type="radio"/> | <input type="radio"/> | <input type="radio"/> | <input type="radio"/> | <input type="radio"/> |

**Please answer all questions compared to one year ago.**

|                                                                     | Yes                   | No                    | Maybe                 |
|---------------------------------------------------------------------|-----------------------|-----------------------|-----------------------|
| Do you feel your memory has declined substantially?                 | <input type="radio"/> | <input type="radio"/> | <input type="radio"/> |
| Do others tell you that you tend to repeat questions over and over? | <input type="radio"/> | <input type="radio"/> | <input type="radio"/> |
| Have you been misplacing things more often?                         | <input type="radio"/> | <input type="radio"/> | <input type="radio"/> |



Do you find that lately you are relying more on written reminders?

Do you need more help from others to remember appointments, family occasions, or holidays?

Do you have more trouble recalling names, finding the right word, or completing sentences?

Do you have more trouble driving (e.g., do you drive more slowly, have more trouble at night, tend to get lost, have accidents)?

Do you have more difficulty managing money (e.g. paying bills, calculating change, completing tax forms)?

Are you less involved in social activities?

Has your work performance (paid or volunteer) declined significantly compared to one year ago?

Do you have more trouble following the news, or the plots of books, movies or TV shows compared to one year ago?

Are there any activities (e.g. hobbies, such as card games, crafts) that are substantially more difficult for you now compared to one year ago?

Are you more likely to become disoriented, or get lost, for example when traveling to another city?

Do you have more difficulty using household appliances (such as the washing machine, television remote, DVD, or computer)?

**Por favor responda todas las preguntas comparando con hace un año.**

|                                                                                                                                     | Sí                    | No, podía hacer esto hace 1 año atrás pero estoy teniendo dificultad ahora | No, no he podido hacer esto en más de 1 año |
|-------------------------------------------------------------------------------------------------------------------------------------|-----------------------|----------------------------------------------------------------------------|---------------------------------------------|
| Por favor responda todas las preguntas comparando con hace un año.                                                                  | <input type="radio"/> | <input type="radio"/>                                                      | <input type="radio"/>                       |
| ¿Otros le dicen que suele repetir preguntas una y otra vez?                                                                         | <input type="radio"/> | <input type="radio"/>                                                      | <input type="radio"/>                       |
| ¿Ha estado perdiendo cosas más seguido?                                                                                             | <input type="radio"/> | <input type="radio"/>                                                      | <input type="radio"/>                       |
| ¿Encuentra que recientemente está dependiendo más en recordatorios escritos?                                                        | <input type="radio"/> | <input type="radio"/>                                                      | <input type="radio"/>                       |
| ¿Necesita más ayuda de otros para recordar citas, ocasiones familiares, o días festivos?                                            | <input type="radio"/> | <input type="radio"/>                                                      | <input type="radio"/>                       |
| ¿Tiene más dificultad recordando nombres, encontrando la palabra correcta, o completando oraciones?                                 | <input type="radio"/> | <input type="radio"/>                                                      | <input type="radio"/>                       |
| ¿Tiene más dificultad manejando (p. ej., maneja más lento, tiene más dificultad en la noche, suele perderse, tiene accidentes)?     | <input type="radio"/> | <input type="radio"/>                                                      | <input type="radio"/>                       |
| ¿Tiene más dificultad administrando dinero (p. ej. pagando facturas, calculando cambio, completando formularios de impuestos)?      | <input type="radio"/> | <input type="radio"/>                                                      | <input type="radio"/>                       |
| ¿Está menos involucrado en actividades sociales?                                                                                    | <input type="radio"/> | <input type="radio"/>                                                      | <input type="radio"/>                       |
| ¿Ha disminuido significativamente su desempeño laboral (pagado o voluntario) comparado a un año atrás?                              | <input type="radio"/> | <input type="radio"/>                                                      | <input type="radio"/>                       |
| ¿Tiene más dificultad siguiendo las noticias, o las tramas de libros, películas o programas de televisión comparado a un año atrás? | <input type="radio"/> | <input type="radio"/>                                                      | <input type="radio"/>                       |

¿Hay alguna actividad (p. ej. pasatiempos, tales como juegos de cartas, manualidades) que es considerablemente más difícil para usted ahora comparado a un año atrás?

¿Es más probable que usted se desoriente, o se pierda, por ejemplo al viajar a otra ciudad?

¿Tiene más dificultad usando electrodomésticos (tales como la lavadora, el control remoto de la televisión, DVD, o computadora)?

### Can you do the following behaviors?

|                                                                                                                  | Yes                   | No, I was able to do 1 year ago but having difficulty now | No, I have not been able to do this for more than 1 year |
|------------------------------------------------------------------------------------------------------------------|-----------------------|-----------------------------------------------------------|----------------------------------------------------------|
| Take care of yourself, that is, eat, bathe, and use the toilet?                                                  | <input type="radio"/> | <input type="radio"/>                                     | <input type="radio"/>                                    |
| Walk indoors, such as around your house?                                                                         | <input type="radio"/> | <input type="radio"/>                                     | <input type="radio"/>                                    |
| Walk a block or two on level ground?                                                                             | <input type="radio"/> | <input type="radio"/>                                     | <input type="radio"/>                                    |
| Climb a flight of stairs or walk up a hill?                                                                      | <input type="radio"/> | <input type="radio"/>                                     | <input type="radio"/>                                    |
| Run a short distance?                                                                                            | <input type="radio"/> | <input type="radio"/>                                     | <input type="radio"/>                                    |
| Do light work around the house like dusting or washing dishes?                                                   | <input type="radio"/> | <input type="radio"/>                                     | <input type="radio"/>                                    |
| Do moderate work around the house like vacuuming, sweeping floors, and carrying in groceries?                    | <input type="radio"/> | <input type="radio"/>                                     | <input type="radio"/>                                    |
| Do heavy work around the house like scrubbing floors or lifting or moving heavy furniture?                       | <input type="radio"/> | <input type="radio"/>                                     | <input type="radio"/>                                    |
| Do garden work like raking leaves, weeding, or pushing lawn mower?                                               | <input type="radio"/> | <input type="radio"/>                                     | <input type="radio"/>                                    |
| Have sexual relations?                                                                                           | <input type="radio"/> | <input type="radio"/>                                     | <input type="radio"/>                                    |
| Participate in moderate recreational activities like golf, bowling, dancing, doubles tennis, or throwing a ball? | <input type="radio"/> | <input type="radio"/>                                     | <input type="radio"/>                                    |

Participate in strenuous sports like swimming, singles tennis, football, basketball, or skiing?

### ¿Puede realizar los siguientes comportamientos?

|                                                                                                                      | Sí                    | No, podía hacer esto hace 1 año atrás pero estoy teniendo dificultad ahora | No, no he podido hacer esto en más de 1 año |
|----------------------------------------------------------------------------------------------------------------------|-----------------------|----------------------------------------------------------------------------|---------------------------------------------|
| ¿Cuidarse, es decir, comer, bañarse, y usar el baño?                                                                 | <input type="radio"/> | <input type="radio"/>                                                      | <input type="radio"/>                       |
| ¿Caminar dentro, tal como en su casa?                                                                                | <input type="radio"/> | <input type="radio"/>                                                      | <input type="radio"/>                       |
| ¿Caminar una cuadra o dos en suelo plano?                                                                            | <input type="radio"/> | <input type="radio"/>                                                      | <input type="radio"/>                       |
| ¿Subir un tramo de escaleras o subir una colina?                                                                     | <input type="radio"/> | <input type="radio"/>                                                      | <input type="radio"/>                       |
| ¿Correr una distancia corta?                                                                                         | <input type="radio"/> | <input type="radio"/>                                                      | <input type="radio"/>                       |
| ¿Hacer trabajo ligero alrededor de la casa como desempolvar o lavar los platos?                                      | <input type="radio"/> | <input type="radio"/>                                                      | <input type="radio"/>                       |
| ¿Hacer trabajo moderado en la casa como aspirar, barrer los pisos, y llevar las bolsas de alimentos adentro?         | <input type="radio"/> | <input type="radio"/>                                                      | <input type="radio"/>                       |
| ¿Hacer trabajo pesado en la casa como fregar el piso o levantando o moviendo muebles pesados?                        | <input type="radio"/> | <input type="radio"/>                                                      | <input type="radio"/>                       |
| ¿Hacer trabajo de jardinería como juntar hojas, deshierbar, o empujar la cortadora de pasto?                         | <input type="radio"/> | <input type="radio"/>                                                      | <input type="radio"/>                       |
| ¿Tener relaciones sexuales?                                                                                          | <input type="radio"/> | <input type="radio"/>                                                      | <input type="radio"/>                       |
| ¿Participar en actividades recreacionales moderadas como golf, boliche, baile, tenis en dobles, o lanzar una pelota? | <input type="radio"/> | <input type="radio"/>                                                      | <input type="radio"/>                       |
| ¿Participar en deportes arduos como natación, tenis de individuales, fútbol americano, baloncesto, o esquiar?        | <input type="radio"/> | <input type="radio"/>                                                      | <input type="radio"/>                       |

Please provide your contact information and preferred communication method.

First Name \_\_\_\_\_  
 Last Name \_\_\_\_\_  
 Address \_\_\_\_\_  
 Email \_\_\_\_\_  
 Phone Number \_\_\_\_\_

---

Please provide your contact information and preferred communication method.

Primer Nombre: \_\_\_\_\_

Apellido: \_\_\_\_\_  
Dirección: \_\_\_\_\_

Correo Electrónico: \_\_\_\_\_

Número de Teléfono: \_\_\_\_\_  
\_\_\_\_\_

---

What is your preferred method for us to contact you?

- Email
- Phone

---

¿Cuál es su método preferido para contactarle?

- Correo Electrónico
- Teléfono
